# Supplementary material for: Decreased Histone Acetylation Levels at Th1 and Regulatory Loci after Induction of Food Allergy
Source: PubMed Central journal article supplement (PMC7603208; doi:10.3390/nu12103193), 2020-10-19
Supplement: nutrients-12-03193-s001.pdf [file nutrients-12-03193-s001.pdf]

**Table S1. Buffers used for ChIP.**

|                                     |                               |
|-------------------------------------|-------------------------------|
| <b>Lysis buffer I</b>               | For 50 mL                     |
| 5 mM PIPES pH 8                     | 0.5 mL 0.5 M PIPES pH 8       |
| 85 mM KCl                           | 1.4 mL 3 M KCl                |
| 0.5% NP40 (Igepal-CA630)            | 0.25 mL Igepal (100%)         |
| Protease inhibitor cocktail tablets | One tablet                    |
| <b>Lysis buffer II</b>              | For 50 mL                     |
| 10 mM Tris-HCl pH 7.5               | 0.5 mL 1 M Tris-HCl pH 7.5    |
| 150 mM NaCl                         | 1.5 mL 5 M NaCl               |
| 1% NP40 (Igepal-CA630)              | 0.5 mL Igepal (100%)          |
| 1% DOC (Natriumdeoxycholat)         | 0.5 g                         |
| 0.1% SDS                            | 0.25 mL 20% SDS               |
| 1 mM EDTA                           | 0.1 mL 0.5 M EDTA pH 8        |
| Protease inhibitor cocktail tablets | One tablet                    |
| <b>Wash buffer I</b>                | For 50 mL                     |
| 20 mM Tris-HCl pH 8                 | 1 mL Tris-HCl pH 8            |
| 150 mM NaCl                         | 1.5 mL 5 M NaCl               |
| 2 mM EDTA                           | 0.2 mL 0.5 M EDTA pH 8        |
| 0.1% SDS                            | 0.25 mL 20% SDS               |
| 1% Triton X100                      | 0.5 mL Triton X100            |
| <b>Wash buffer II</b>               | For 50 mL                     |
| 20 mM Tris-HCl pH 8                 | 1 mL Tris-HCl pH 8            |
| 500 mM NaCl                         | 5 mL 5 M NaCl                 |
| 2 mM EDTA                           | 0.2 mL 0.5 M EDTA pH 8        |
| 0.1% SDS                            | 0.25 mL 20% SDS               |
| 1% Triton X100                      | 0.5 mL Triton X100            |
| <b>Wash buffer III</b>              | For 50 mL                     |
| 10 mM Tris-HCl pH 8                 | 0.5 mL Tris-HCl pH 8          |
| 1% IGEPAL CA630                     | 0.5 mL IGEPAL (100%)          |
| 1% DOC (Sodium deoxycholat)         | 0.5 g                         |
| 1 mM EDTA                           | 0.1 mL 0.5 M EDTA pH 8        |
| 0.25 M LiCl                         | 1.25 mL 10 M LiCl             |
| <b>1 x TE</b>                       | For 50 mL                     |
| 10 mM Tris-HCl pH 8                 | 0.5 mL Tris-HCl pH 8          |
| 1 mM EDTA                           | 0.1 mL 0.5 M EDTA pH 8        |
| <b>Elution buffer</b>               | For 25 mL                     |
| 1% SDS                              | 1.25 mL 20% SDS               |
| 0.1 M NaHCO <sub>3</sub>            | 2.5 mL 1 M NaHCO <sub>3</sub> |

**Table S2. Primers used for qPCR.**

| <b>Locus</b>      | <b>Forward primer</b>         | <b>Reverse primer</b>         |
|-------------------|-------------------------------|-------------------------------|
| <i>Rpl32</i>      | TCA TTT CTC AGG CAC ATC TT    | ACT CAC CGT AAA ACA GAT GG    |
| <i>Il4</i>        | TCT GCC TCC ATC ATC CTT CT    | ACA CCA TAA TCG GCC TTT CA    |
| <i>Il5</i>        | ACC CTG AGT TTC AGG ACT CG    | TCC CCA AGC AAT TTA TTC TCT C |
| <i>Il10</i>       | CGA CCA GTT CTT TAG CGC TT    | TGT GGC TTT GGT AGT GCA AG    |
| <i>Il17a</i>      | TGG TTC TGT GCT GAC CTC AT    | GCT CTC CCT GGA CTC ATG TT    |
| <i>Gata3</i>      | CAC TCG GAT TCC TCT CTC CC    | CCA GGA GAG GGG TCG TTT AA    |
| <i>Tbx21</i>      | AGA GAA AGC CCA GGA GCA G     | TTC CAG CAG CCG TCG AAG       |
| <i>Rorc, i.2*</i> | TGG GGT GCC TGT CAT CAT AC    | TGA GAA CTT GGC TCC CTG TC    |
| <i>Foxp3</i>      | GAC TCA AGG GGG TCT CA        | TTG GGC TTC ATC GGC AA        |
| <i>Ifng</i>       | CAT ACC CTT TCC TTG CTT TTC   | TTG TGG GAT TCT CTG AAA GCA   |
| <i>Tnf</i>        | TGG GTT TCA GTT CTC AGG GT    | GGG TTT GGA AAG TTG GGG AC    |
| <i>Tgfb</i>       | GCT CCC CTA TTT AAG AAC ACC C | CTC CCA AGG AAA GGT AGG TGA   |
| <i>Il4ra</i>      | TGG CTT GCA GAC TCA GAA GA    | GGC TTG CCA TCC TGT TTT GA    |
| <i>Stat6</i>      | GTG TGG TTC AAT GGA GCT CC    | TGT TTC CGG CTT CTC TGT CT    |
| <i>Cd40</i>       | TGG CTT TTG AGG TCC TGG AT    | ATG GCT AGT CAC TGA GCA GG    |

All oligonucleotides were synthesized by Metabion (Planegg, Germany).

\*RAR-related orphan receptor gamma, isoform 2 (RORgammaT) locus.

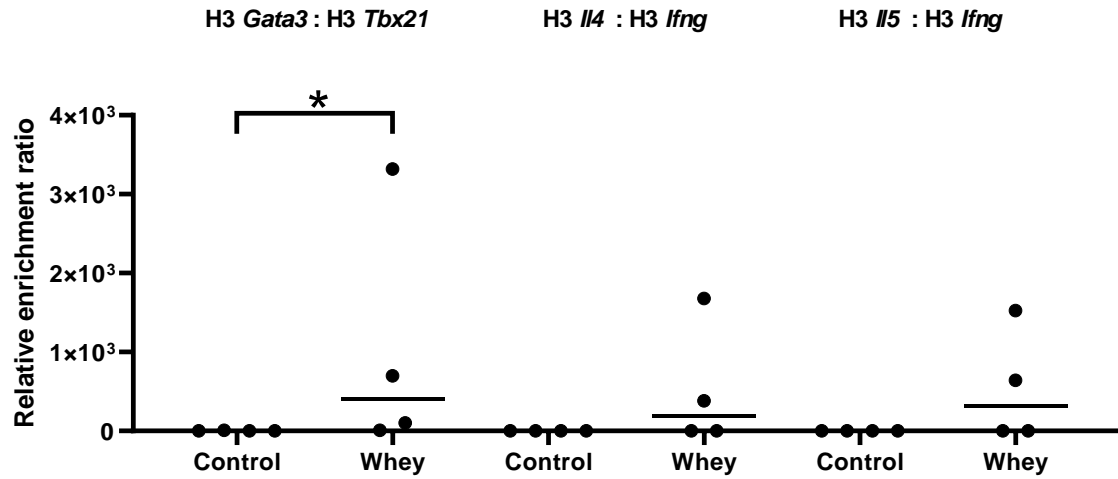

**Figure S1.** A confirmed allergic response to whey protein increased the ratio of histone H3 acetylation levels at the gene encoding *Gata3* (*Gata3*) and the gene encoding T-box 21 (*Tbx21*) in spleen-derived CD4<sup>+</sup> T cells. Ratios of histone H3 acetylation levels at the *Gata3* locus and the *Tbx21* locus, the gene encoding interleukin 4 (*Il4*) and the gene encoding interferon  $\gamma$  (*Ifng*), and the gene encoding interleukin 5 (*Il5*) and *Ifng* in spleen-derived CD4<sup>+</sup> T cells of whey-sensitized mice and control mice upon challenge as determined by chromatin immunoprecipitation followed by qPCR. Data are presented as scatter dot plots showing individual data points and median. Comparisons were performed with a Mann-Whitney U test. \* $p < 0.05$ .
